# Supplementary material
Source: PubMed Central journal article supplement (PMC1413739)
Supplement: pnas_0510941103_1.pdf [file pnas_0510941103_1.pdf]

|                                | 100                                 | 110                 | 120            | 130           | 140            | 150          | 160         | 170         | 180          |           |           |          |
|--------------------------------|-------------------------------------|---------------------|----------------|---------------|----------------|--------------|-------------|-------------|--------------|-----------|-----------|----------|
| sp P04637 P53_HUMAN            | SSSVPSQKTYQGSYGFRLGFLHSGTAKSVTCTYS  | PALNKMFCQLAKT       | CPVQLWVDST     | PPP           | PGTRVRAMAIYK   | QSQHMTEVVRRC | PHHERCSD    | -----       | SDGLA        |           |           |          |
| tr Q7LDI3 P63_HUMAN            | PPA                                 | PSNTDYPGPHSFDVSFQSS | TAKSATWTYSTELK | KLYCQIAKTCPI  | QIKVMT         | PPQ          | GAVIRAMPVYK | KA          | EHVTEVVKRCPN | NHEL      | SREFN     | ---EGQIA |
| sp O15350 P73_HUMAN            | APV                                 | PSNTDYPGPHHFEVTFQSS | TAKSATWTYSP    | LKLYCQIAKTCPI | QIKVST         | PPP          | GTAIRAMPVYK | KA          | EHVTEVVKRCPN | NHEL      | GRDFN     | ---EGQSA |
| sp P13481 P53_CERAE_Monkey     | SSSVPSQKTYHGSYGFRLGFLHSGTAKSVTCTYS  | PDLNKMFCQLAKT       | CPVQLWVDST     | PPP           | GSRVRAMAIYK    | QSQHMTEVVRRC | PHHERCSD    | -----       | SDGLA        |           |           |          |
| sp Q9TTA1 P53_TUPGB_TreeShrew  | SSSVPSQKTYQGSYGFRLGFLHSGTAKSVTCTYS  | PDLNKLFCQLAKT       | CPVQLWVDSA     | PPP           | PGTRVRAMAIYK   | QSQYVTEVVRRC | PHHERCSD    | -----       | SDGLA        |           |           |          |
| sp O36006 P53_MARMO_Woodchuck  | SSSVPSQNTYPGVYGFRLGFLHSGTAKSVTCTYS  | PSLNKLFCQLAKT       | CPVQLWVDST     | PPP           | PGTRVRAMAIYK   | KSQHMTEVVRRC | PHHERCSD    | -----       | SDGLA        |           |           |          |
| sp Q64662 P53_SPEBE_Squirrel   | SSSVPSQNTYPGVYGFRLGFIHSGTAKSVTCTYS  | PSLNKLFCQLAKT       | CPVQLWVDST     | PPP           | PGTRVRAMAIYK   | KSQHMTEVVRRC | PHHERCSD    | -----       | SDGLA        |           |           |          |
| tr Q68VB0 P53_MoleRat          | SSSVPSQKTYQGSYGFRLGFLHSGTAKSVTCTYS  | PDLNKLFCQLAKT       | CPVQLWVDST     | PPP           | PGTRVRAMAIYK   | KSQHMTEVVRRC | PHHERCSD    | -----       | SDGLA        |           |           |          |
| sp Q95330 P53_RABBIT           | SSSVPSQKTYHGNYGFRLLGFLHSGTAKSVTCTYS | PDLNKLFCQLAKT       | CPVQLWVDST     | PPP           | PGTRVRAMAIYK   | KSQHMTEVVRRC | PHHERCSD    | -----       | SDGLA        |           |           |          |
| tr Q8SPZ3 P53_WHALE            | SSFVPSQKTYPGSYGFHLGFLHSGTAKSVTCTYS  | PALNKLFCQLAKT       | CPVQLWVSSP     | PPP           | PGTRVRAMAIYK   | KSEY         | MTEVVRRC    | PHHERCSDY   | ---SDGLA     |           |           |          |
| sp Q9TUB2 P53_PIG              | SSFVPSQKTYPGSYDFRLGFLHSGTAKSVTCTYS  | PALNKLFCQLAKT       | CPVQLWVSSP     | PPP           | PGTRVRAMAIYK   | KSEY         | MTEVVRRC    | PHHERSSDY   | ---SDGLA     |           |           |          |
| sp Q9WUR6 P53_CAVPO_GuineaPig  | SSSVPSHKPYRGSYGFVHFLKSGTAKSVTCTYS   | PDLNKLFCQLAKT       | CPVQVWVES      | PPP           | PGTRVRALAIYK   | KSQHMTEVVRRC | PHHERCSD    | -----       | SDGLA        |           |           |          |
| sp P67939 P53_BOVIN_Taurus     | SSFVPSQKTYPGNYGFRLGFLQSGTAKSVTCTYS  | PSLNKLFCQLAKT       | CPVQLWVDS      | PPP           | PGTRVRAMAIYK   | KLEHMTEVVRRC | PHHERSSDY   | ---SDGLA    |              |           |           |          |
| sp P67938 P53_BOVIN_Zebu       | SSFVPSQKTYPGNYGFRLGFLQSGTAKSVTCTYS  | PSLNKLFCQLAKT       | CPVQLWVDS      | PPP           | PGTRVRAMAIYK   | KLEHMTEVVRRC | PHHERSSDY   | ---SDGLA    |              |           |           |          |
| sp P51664 P53_SHEEP            | SSFVPSQKTYPGNYGFRLGFLHSGTAKSVTCTYS  | PSLNKLFCQLAKT       | CPVQLWVDS      | PPP           | PGTRVRAMAIYK   | KLEHMTEVVRRC | PHHERSSDY   | ---SDGLA    |              |           |           |          |
| sp P79892 P53_HORSE_frgt       | SSFVPSQKTYPGCYGFRLGFLNSGTAKSVTCTYS  | PDLNKLFCQLAKT       | CPVQLLVSS      | PPP           | PGTRVRAMAIYK   | KSEFMTEVVRRC | PHHERCSDS   | ---SDGLA    |              |           |           |          |
| sp Q29537 P53_CANFA_Dog        | SSSVPSPKTYPGTYGFRLGFLHSGTAKSVTWTYS  | PDLNKLFCQLAKT       | CPVQLWVSS      | PPP           | NTCVRAMAIYK    | KSEFVTEVVRRC | PHHERCSDS   | ---SDGLA    |              |           |           |          |
| sp P41685 P53_FELCA_Cat        | SSFVPSQKTYPGAYGFHLGFLQSGTAKSVTCTYS  | PDLNKLFCQLAKT       | CPVQLWVRS      | PPP           | PGTCVRAMAIYK   | KSEFMTEVVRRC | PHHERCPDS   | ---SDGLA    |              |           |           |          |
| sp P10361 P53_RAT_Norvegicus   | SSSVPSQKTYQGNYGFRLLGFLQSGTAKSVMCTYS | ISLNKLFCQLAKT       | CPVQLWVST      | PPP           | PGTRVRAMAIYK   | KSQHMTEVVRRC | PHHERCS     | -----       | DGGLA        |           |           |          |
| tr Q920Y0 P53_Gerbil           | SSFVPSHKTFQGNYGFRLLGFLQSGTAKSVTCTYS | PSLNKLFCQLAKT       | CPVQLWVSSA     | PPP           | PGTRVRAMAIYK   | NSQHMTEVVRRC | PHHERCS     | ENEASDPRGRA |              |           |           |          |
| sp P02340 P53_MOUSE            | SSFVPSQKTYQGNYGFRLLGFLQSGTAKSVMCTYS | PDLNKLFCQLAKT       | CPVQLWVSAT     | PPA           | GSRVRAMAIYK    | KSQHMTEVVRRC | PHHERCS     | -----       | DGGLA        |           |           |          |
| sp P10360 P53_CHICKEN          | SPVVPSTEDYGGDFDFRVGFVEAGTAKSVTCTYS  | PVLNKVYCR           | LAKPCPVQVRV    | GVAPP         | PGSSLRAVAVYK   | KSEHVAE      | VVRRC       | PHHERCGGG   | ---TDGLA     |           |           |          |
| tr Q6NTF1 P53_Xenopus_tropical | SSAVPSTEDYAGSYGLKLEFQQNGTAKSVTCTYS  | TDLNKLFCQLAKT       | CPVQLLVRR      | VERPP         | PLGSLRATAVYK   | KSEHVAE      | VVRRC       | PHHERSV     | EP---GDPA    |           |           |          |
| sp Q9W678 P53_BARBU_Fish       | TASVPVATDYPGEHGFKLGFQSGTAKSVTCTYS   | SDLNKLFCQLAKT       | CPVQMVV        | NVA           | PPQGSVIRATAIYK | KSEHVAE      | VVRRC       | PHHERTPDG   | ---DGLA      |           |           |          |
| sp P79734 P53_BRARE            | TSTVPETSDYPGDHGFRLRFPQSGTAKSVTCTYS  | PDLNKLFCQLAKT       | CPVQMVV        | DVA           | PPQGSVIRATAIYK | KSEHVAE      | VVRRC       | PHHERTPDG   | ---DGLA      |           |           |          |
| sp O93379 P53_ICTPU_Catfish    | TSTVPVTSYDYPGLLNFTHFQESSGTSVTCTYS   | PDLNKLFCQLAKT       | CPVLM          | AVSSS         | PPPGSVLRATAVYK | RSEHVAE      | VVRRC       | PHHERS      | NDSS---DGPA  |           |           |          |
| sp P25035 P53_ONCMY_RainbowTro | TSTVPVTSYDYPGALGFQLRFLQSGTAKSVTCTYS | PDLNKLFCQLAKT       | CPVQIVV        | DHPP          | PPGAVVRALAIYK  | KLSDVAD      | VVRRC       | PHHQST      | SENN---EGPA  |           |           |          |
| sp Q92143 P53_XIPMA_Platyfish  | APTVPAINSYAGEHGFNLEFNDSGTAKSVTSTYS  | VKLGKLF             | CQLAKTTP       | IGVLV         | KEPPQ          | GAVIRATAVYK  | KTEHV       | GEVVRRC     | PHHQSE       | DLS-----D |           |          |
| sp O57538 P53_XIPHE_Fish       | APTVPAINSYAGEHGFNLEFNDSGTAKSVTSTYS  | VKLGKLF             | CQLAKTTP       | IGVLV         | KEPPQ          | GAVIRATS     | VYK         | KTEHV       | GEVVRRC      | PHHQSE    | DLS-----D |          |
