# Supplementary material
Source: PubMed Central journal article supplement (PMC1413739)

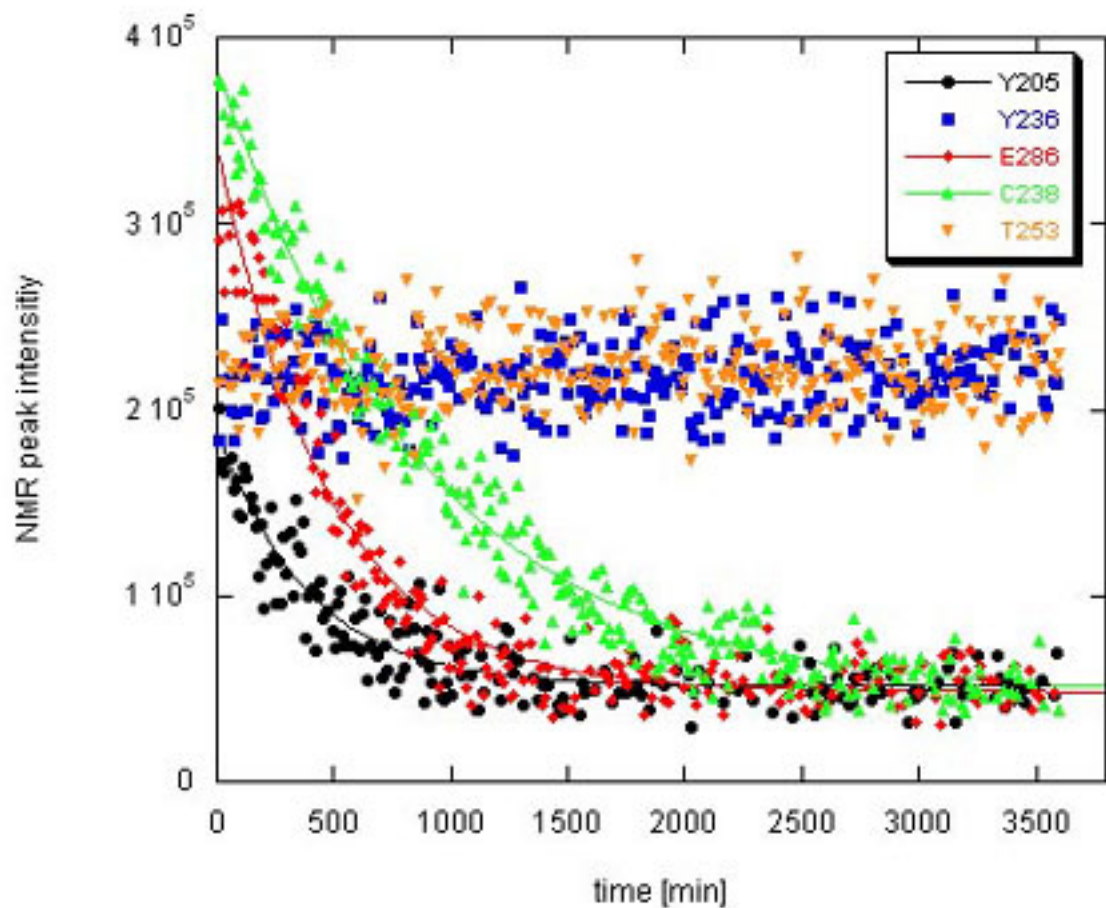

Supplement: pnas_0510941103_2.pdf [file pnas_0510941103_2.pdf]
